# Supplementary material for: Superhydrophobic and transparent coatings based on removable polymeric spheres
Source: Royal Society of Chemistry journal article supplement (doi:10.1039/b812659c), 2008-12-10
Supplement: b812659c.pdf [file b812659c.pdf]

# Supplementary Information

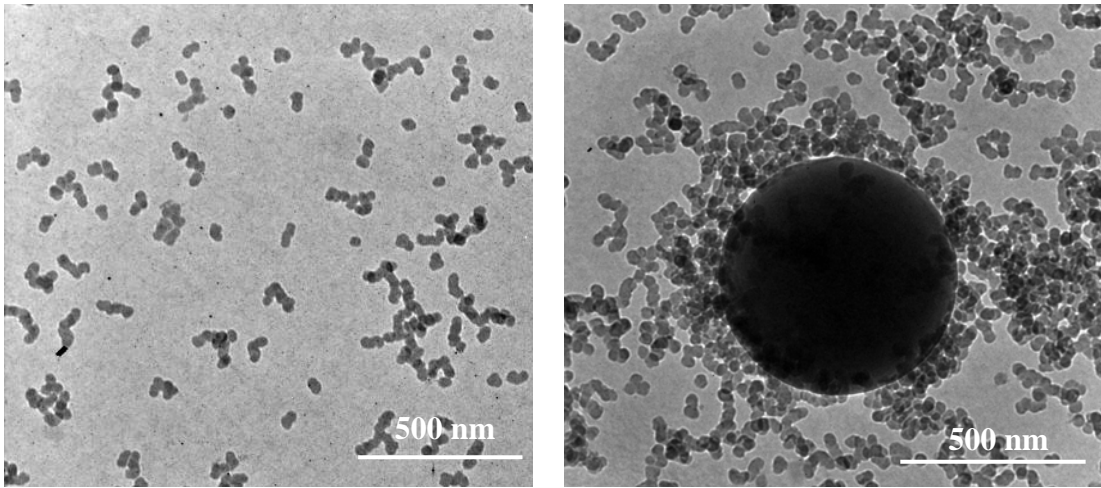

Fig. S1. TEM images of silica and PS colloid particles.

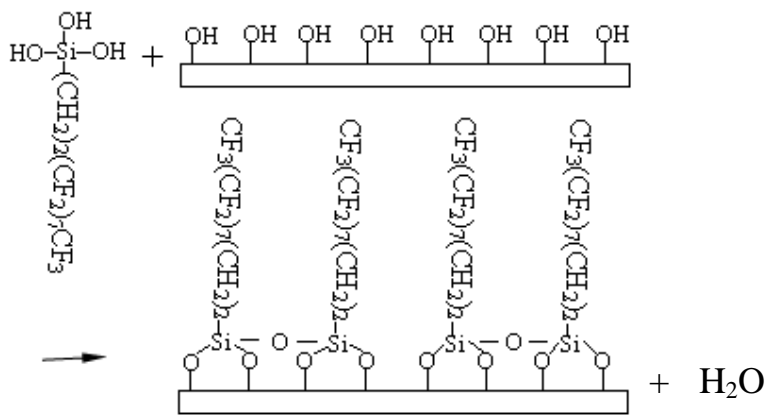

Fig. S2. Scheme of the reaction of the hydrolytic FAS with the glass substrate.
